# Supplementary material
Source: Research Square preprint supplement (doi:10.21203/rs.3.rs-10121282/v1)
Supplement: Supplementary file 1 [file 3f1ab7300c11958ade3bee09.docx]

***Supplemental***

Effects of Tablet Crushing Methods on Solid-State Properties, Dissolution Behavior, and Dispensability of Acetaminophen Tablets

Yayoi Kawanoa,b, Tomohiro Tsuchidaa, Na Ronga, Kaoru Hirosea, Nobuyuki Natoric, Narumi Maidaa, Satoru Gotoa, Takehisa Hanawaa,*

a Faculty of Pharmaceutical Sciences, Tokyo University of Science, 6-3-1 Niijuku, Katsushika-ku, Tokyo 125-8585, Japan

b Graduate School of Pharmaceutical Sciences, Nagoya City University, 3-1 Tanabe-dori, Mizuho-ku, Nagoya 467-8603, Japan

c Formulation Department, CMC Center, Kaken Pharmaceutical Co., Ltd. 301, Gensuke, Fujieda-shi, Shizuoka 426-8646, Japan


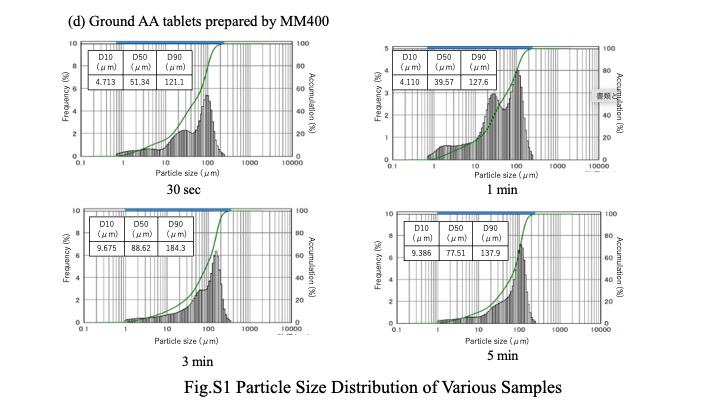

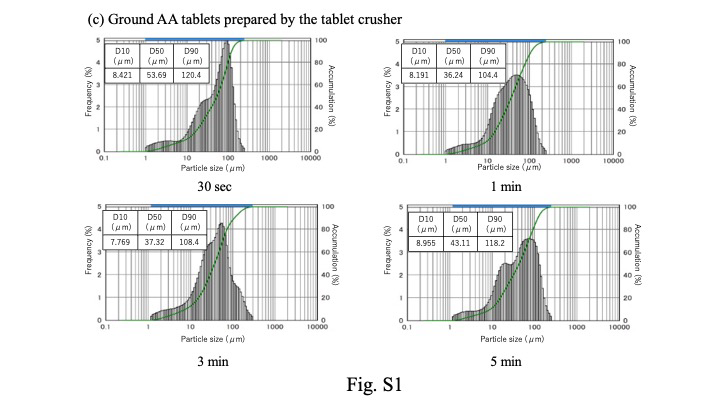

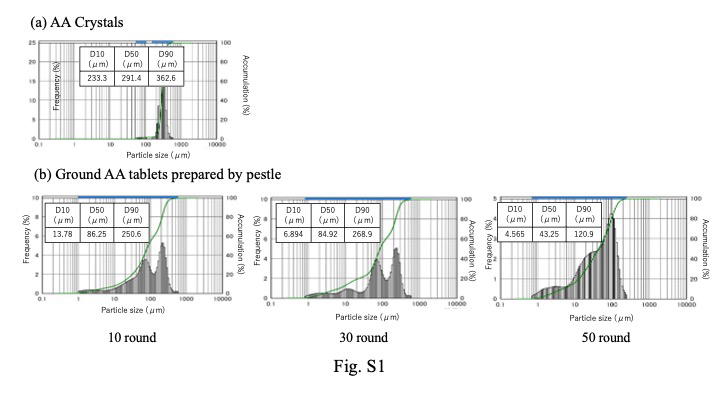


OBM

Fig.S1 Particle Size Distribution of Various Samples

Fig. S2. PXRD Patterns of Lactose Hydrate Crystals and Ground Samples Prepared Using Various Methods.

Fig.3. FTIR Spectra of Various Samples
